# Supplementary material for: Early type 1 diabetes aggravates renal ischemia/reperfusion-induced acute kidney injury
Source: PubMed Central journal article supplement (PMC8463569; doi:10.1038/s41598-021-97839-7), 2021-09-24
Supplement: 41598_2021_97839_MOESM1_ESM.pdf [file 41598_2021_97839_MOESM1_ESM.pdf]

## Supplementary Material

### **Early type 1 diabetes aggravates renal ischemia/reperfusion-induced acute kidney injury**

Mariana Charleaux de Ponte, Vanessa Gerolde Cardoso, Guilherme Lopes Gonçalves, Juliana Martins Costa-Pessoa and Maria Oliveira-Souza\*

Laboratory of Renal Physiology, Department of Physiology and Biophysics, Institute of Biomedical Sciences, University of Sao Paulo, Sao Paulo, Brazil

#### **\*Corresponding author**

Prof. Maria Oliveira-Souza, Ph.D.

Laboratory of Renal Physiology, Department of Physiology and Biophysics, Institute of Biomedical Sciences, University of Sao Paulo, SP 05508-900, Brazil

Telephone number: 55 (11) 3091-8043

Fax number: 55 (11) 3091-7285

E-mail: [souza@icb.usp.br](mailto:souza@icb.usp.br)

**Supplementary Table S1: Physiological parameters.**

| Parameters                       | Multiple Comparisons |                    |                |                    | Two-way ANOVA                    |                   |
|----------------------------------|----------------------|--------------------|----------------|--------------------|----------------------------------|-------------------|
|                                  | Sham (8)             | IR (8)             | STZ (7)        | STZ/IR (5-7)       | STZ/IR                           | <i>p</i> -value   |
| Final blood glucose, mg/dL       | 98.5 ± 13.0          | 92.5 ± 25.3        | 251.8 ± 90.7** | 273.4 ± 139.2&&    | F (1,24) = 0.2316 <sup>ns</sup>  | <i>p</i> = 0.6347 |
| Final body weight, g             | 22.2 ± 1.0           | 19.0 ± 1.0****     | 21.4 ± 1.7     | 18.7 ± 0.9###      | F (1, 26) = 0.3604 <sup>ns</sup> | <i>p</i> = 0.5535 |
| Body weight gain, g              | -1.6 ± 0.5           | -3.6 ± 0.7***      | -1.0 ± 0.5     | -3.7 ± 1.1####     | F (1, 26) = 1.631 <sup>ns</sup>  | <i>p</i> = 0.2128 |
| Kidney weight /body weight, mg/g | 6.24 ± 0.45          | 8.80 ± 0.98****    | 6.47 ± 0.44    | 8.78 ± 0.71####    | F (1,26) = 0.2444 <sup>ns</sup>  | <i>p</i> = 0.6252 |
| Parameters                       | Sham (4-8)           | IR (4-7)           | STZ (4-7)      | STZ/IR (3-6)       | STZ/IR                           | <i>p</i> -value   |
| Plasma Creatinine, mg/dL         | 0.203 ± 0.068        | 0.939 ± 0.582*     | 0.179 ± 0.078  | 1.839 ± 0.709####& | F (1,22) = 6.432 <sup>+</sup>    | <i>p</i> = 0.018  |
| Plasma Urea, mg/dL               | 41.49 ± 2.82         | 283.95 ± 142.90*** | 35.29 ± 4.01   | 323.61 ± 153.91### | F (1,25) = 0.358 <sup>ns</sup>   | <i>p</i> = 0.554  |
| Urinary albumin, Alb/Cr ratio    | 0.155 ± 0.114        | 1.569 ± 0.951*     | 0.247 ± 0.106  | 3.159 ± 0.742####& | F (1,11) = 5,871 <sup>+</sup>    | <i>p</i> = 0.034  |

Two-way ANOVA with the Bonferroni multiple comparisons test was performed to compare data (means ± SDs). The number of animals per group is indicated in parentheses. For multiple comparisons: \**p*<0.05, \*\*\**p*<0.001, \*\*\*\**p*<0.0001 vs sham; ###*p*<0.01, ####*p*<0.001, #####*p*<0.0001 vs STZ group; &*p*<0.05, &&*p*<0.01 vs IR group. The F values and significance of the two-way ANOVA considering the interaction between renal ischemia/reperfusion (IR) and STZ treatment are given: <sup>+</sup>*p*<0.05. Ns: nonsignificant; *p*: *p* value; g: grams.

**Supplementary Table S2: Genes and proteins expression.**

| Parameters                    | Multiple Comparisons |                      |                      |                             |                                 | Two-way ANOVA |
|-------------------------------|----------------------|----------------------|----------------------|-----------------------------|---------------------------------|---------------|
| mRNA expression (fold change) | Sham (7-8)           | IR (7-8)             | STZ (7)              | STZ/IR (5-7)                | STZ/IR                          | p-value       |
| <i>Nphp1</i>                  | 1.00 ± 0.10          | 0.70 ± 0.09****      | 0.96 ± 0.10          | 0.48 ± 0.10#####&&          | F (1,25) = 5.656 <sup>+</sup>   | p = 0.0253    |
| <i>Haver1</i>                 | 1.09 ± 0.53          | 284.70 ± 78.70****   | 3.90 ± 2.54          | 659.18 ± 205.13#####&&&&    | F (1,22) = 23.520****           | p < 0.0001    |
| <i>Mki67</i>                  | 1.04 ± 0.31          | 20.91 ± 9.65****     | 2.49 ± 1.00          | 1.55 ± 1.27&&&&             | F (1,25) = 29.000****           | p < 0.0001    |
| <i>Il1b</i>                   | 1.08 ± 0.46          | 5.58 ± 1.44****      | 1.90 ± 0.71          | 11.89 ± 3.71#####&&&&       | F (1,22) = 14.610***            | p = 0.0009    |
| <i>Tnf</i>                    | 1.06 ± 0.38          | 5.62 ± 1.74*         | 2.30 ± 0.60          | 9.63 ± 6.25##               | F (1,24) = 1.465 <sup>ns</sup>  | p = 0.2379    |
| <i>Ccl2</i>                   | 1.08 ± 0.42          | 15.94 ± 7.00*        | 3.84 ± 1.47          | 18.97 ± 21.48               | F (1,23) = 0.001 <sup>ns</sup>  | p = 0.9720    |
| <i>Nfkb1</i>                  | 1.01 ± 0.15          | 1.72 ± 0.47*         | 1.07 ± 0.13          | 2.13 ± 0.80##               | F (1,26) = 0.966 <sup>ns</sup>  | p = 0.3346    |
| <i>Tgfb2</i>                  | 1.02 ± 0.24          | 1.72 ± 0.79          | 1.34 ± 0.53          | 1.95 ± 0.63                 | F (1,24) = 0.043 <sup>ns</sup>  | p = 0.8376    |
| <i>Acta2</i>                  | 1.04 ± 0.32          | 4.48 ± 1.79*         | 0.99 ± 0.32          | 8.94 ± 4.50#####&&          | F (1,24) = 0.043 <sup>ns</sup>  | p = 0.0150    |
| <i>Col1a1</i>                 | 1.03 ± 0.31          | 15.90 ± 3.28****     | 1.43 ± 0.36          | 5.77 ± 5.44&&&&             | F (1,26) = 6.783 <sup>+</sup>   | p < 0.0001    |
| <i>Col3a1</i>                 | 1.07 ± 0.45          | 23.43 ± 7.16****     | 1.43 ± 0.91          | 12.22 ± 6.16###&&           | F (1,23) = 10.820 <sup>+</sup>  | p = 0.0032    |
| <i>Col4a1</i>                 | 1.01 ± 0.21          | 2.92 ± 0.77****      | 1.24 ± 0.23          | 3.20 ± 1.09####             | F (1,26) = 0.009 <sup>ns</sup>  | p = 0.9224    |
| Protein Staining              | Sham (5-6)           | IR (6)               | STZ (5-6)            | STZ/IR (5-6)                | STZ/IR                          | p-value       |
| Desmin, IF                    | 25020 ± 9756         | 32109 ± 5900         | 24033 ± 6439         | 64750 ± 15234#####&&&&      | F (1,20) = 16.810***            | p = 0.0006    |
| Nephrin, IF                   | 8007761 ± 18401      | 3119389 ± 694342**** | 4478745 ± 105193**** | 4091277 ± 327249            | F (1,20) = 39.240****           | p < 0.0001    |
| WT1, IF                       | 239201 ± 39410       | 126686 ± 19018***    | 219889 ± 33969       | 192971 ± 38535 <sup>k</sup> | F (1,17) = 8.742 <sup>+</sup>   | p = 0.0088    |
| Megalin, IF                   | 1684 ± 561           | 453 ± 131****        | 647 ± 393***         | 392 ± 225                   | F (1,19) = 10.880 <sup>+</sup>  | p = 0.0038    |
| Tubular injury score          | 0.167 ± 0.121        | 6.167 ± 1.600****    | 1.267 ± 0.582        | 9.200 ± 1.122#####&&&&      | F (1,20) = 5.376 <sup>+</sup>   | p = 0.0311    |
| Collagen index                | 0.287 ± 0.119        | 0.628 ± 0.065****    | 0.403 ± 0.078        | 0.697 ± 0.135####           | F (1,20) = 0.3298 <sup>ns</sup> | p = 0.5722    |
| Protein/β-actin ratio         | Sham (4-6)           | IR (4-5)             | STZ (4-6)            | STZ/IR (4-6)                | STZ/IR                          | p-value       |
| AMPKα                         | 1.00 ± 0.12          | 0.91 ± 0.25          | 0.91 ± 0.17          | 0.92 ± 0.21                 | F (1,15) = 0.2857 <sup>ns</sup> | p = 0.6008    |
| pAMPKα <sup>Thr172</sup>      | 1.00 ± 0.10          | 0.76 ± 0.10*         | 1.16 ± 0.11          | 0.90 ± 0.15 <sup>#</sup>    | F (1,18) = 0.053 <sup>ns</sup>  | p = 0.8201    |
| Beclin-1                      | 1.00 ± 0.12          | 0.92 ± 0.11          | 0.92 ± 0.13          | 0.98 ± 0.06                 | F (1,19) = 2.189 <sup>ns</sup>  | p = 0.1554    |
| LC3 I                         | 1.00 ± 0.12          | 0.92 ± 0.05          | 0.75 ± 0.10*         | 0.95 ± 0.02 <sup>#</sup>    | F (1,12) = 10.230 <sup>+</sup>  | p = 0.0077    |
| LC3 II                        | 1.00 ± 0.16          | 0.97 ± 0.24          | 0.71 ± 0.11          | 1.20 ± 0.27 <sup>#</sup>    | F (1,12) = 6.293 <sup>+</sup>   | p = 0.0275    |
| SQSTM1/p62                    | 0.93 ± 0.16          | 1.47 ± 0.22*         | 1.35 ± 0.29          | 1.54 ± 0.32                 | F (1,13) = 2.160 <sup>ns</sup>  | p = 0.1654    |

Two-way ANOVA with the Bonferroni multiple comparisons test was performed to compare data (means ± SDs). The number of animals per group is indicated in parentheses. For multiple comparisons: \*p<0.05, \*\*\*p<0.001 \*\*\*\*p<0.0001 vs sham; #p<0.05, ##p<0.01, ###p<0.001, ####p<0.0001 vs STZ group; &p<0.05, &&p<0.01, &&&p<0.001, &&&&p<0.0001 vs renal ischemia (IR) group. The F values and significance of the two-way ANOVA considering the interaction between renal ischemia/reperfusion (IR) and STZ treatment are given: \*p<0.05, \*\*p<0.01, \*\*\*p<0.001, \*\*\*\*p<0.0001. *Nphp1*: nephrin; *Haver 1*: Kim-1; *Mki67*: Ki-67; *Il1b*: IL-1β; *Tnf*: TNF-α; *Ccl2*: MCP-1; *Nfkb1*: NFκB1; *Tgfb2*: TGF-β2; *Acta2*: α-SMA; *Col1a1*: Collagen I; *Col3a1*: Collagen III; *Col4a1*: Collagen IV; IF: immunofluorescence; ns: nonsignificant.

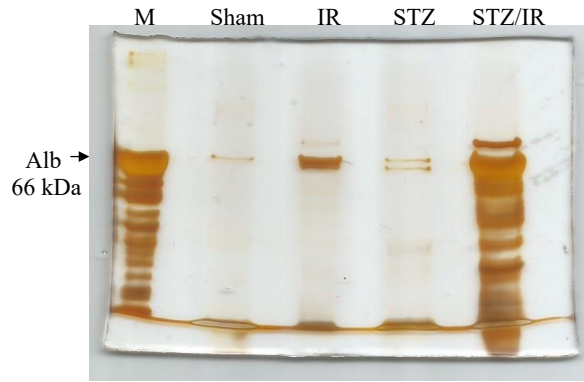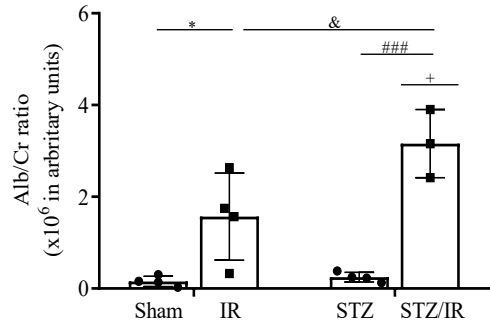

**Supplementary Fig. S1:** Effect of renal ischemia/reperfusion in vehicle- and STZ-treated mice on albuminuria.

Representative full-length gel as well as the averages of albumin bands intensities. <sup>+</sup>p<0.05 for the interaction between diabetes and renal IR (STZ/IR), as indicated by two-way ANOVA (Supplementary Table S1). The Bonferroni post hoc test was also performed: \*p<0.05 vs sham group; ###p<0.001 vs STZ group; &p<0.05 vs IR group. The values are the mean ± S.D. (n = 3-8). Sham: sham-operated; IR, ischemia reperfusion; STZ: streptozotocin; STZ/IR: streptozotocin/ischemia/reperfusion; Alb: albumin; M: marker.

Desmin

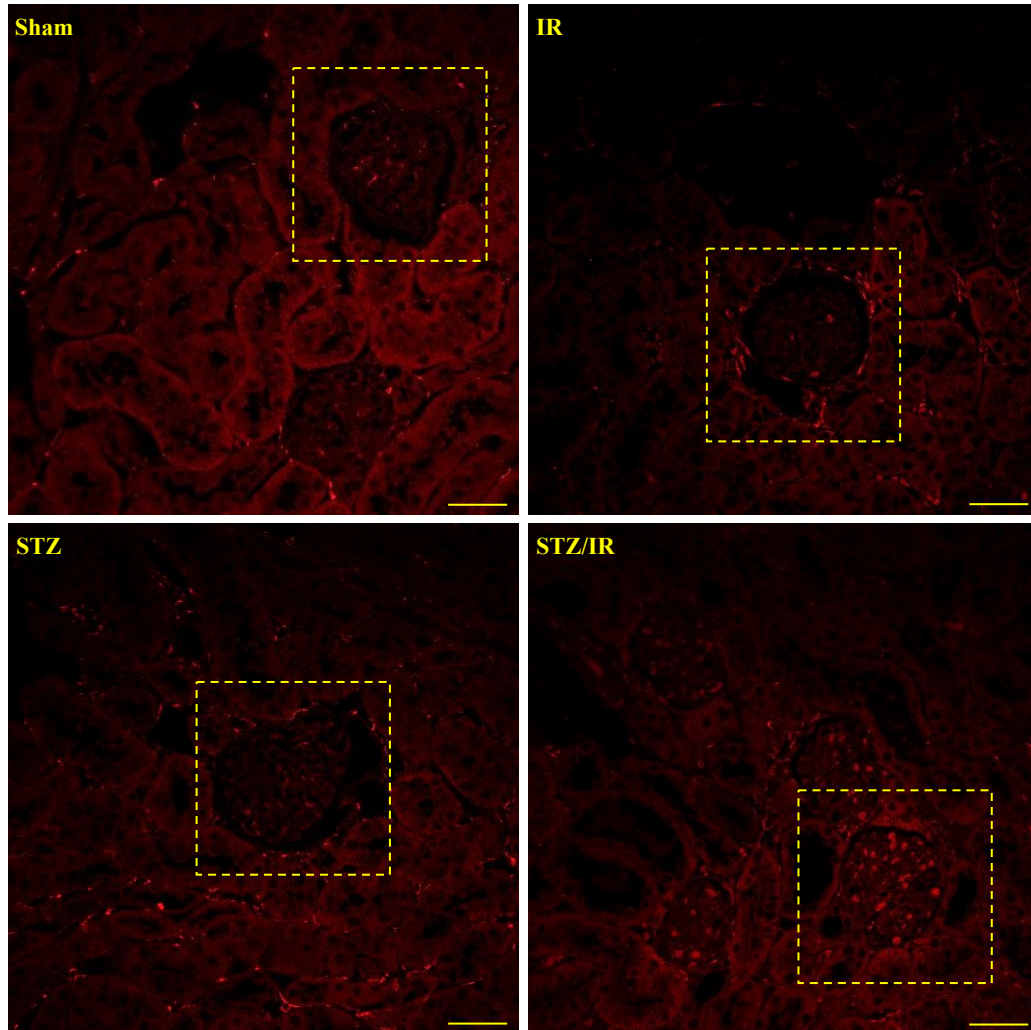

**Supplementary Fig. S2a:** Effect of renal ischemia/reperfusion in vehicle- and STZ-treated mice on desmin staining. Immunofluorescence images were captured using a Zeiss LSM 510 confocal microscope equipped with a 40x objective and laser excitation at 488 or 543 nm. Sham: sham-operated; IR: ischemia/reperfusion; STZ: streptozotocin; STZ/IR: streptozotocin/ischemia/reperfusion. Bars = 100  $\mu$ m.

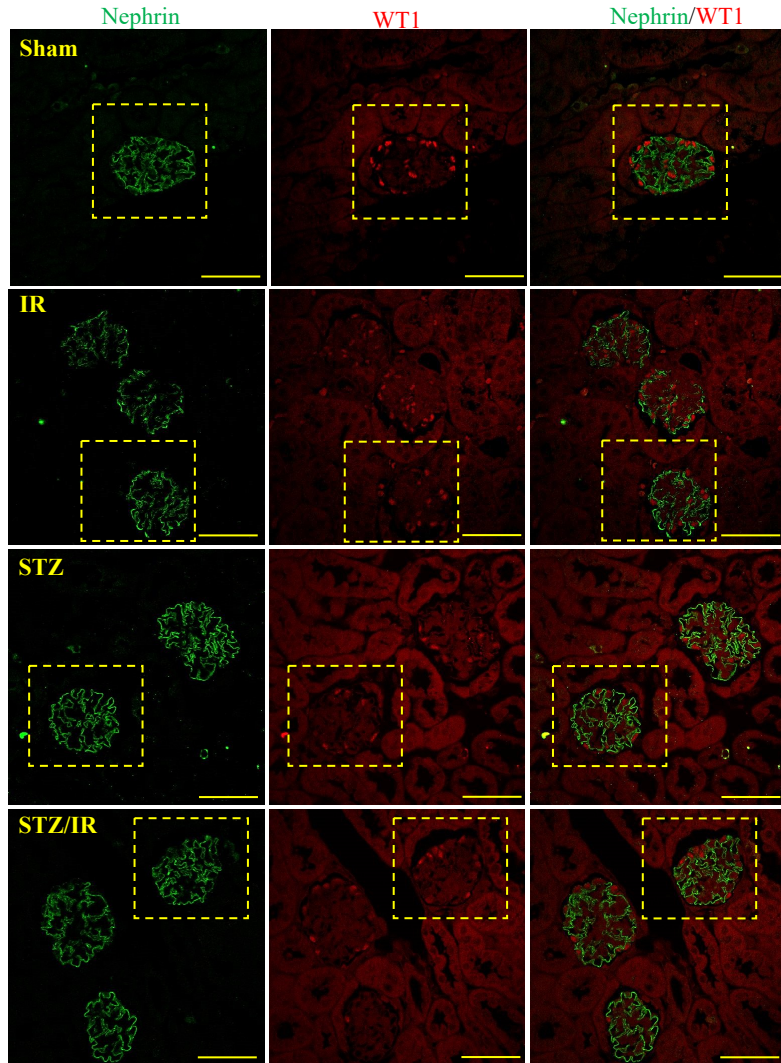

**Supplementary Fig. S2b:** Effect of renal ischemia/reperfusion in vehicle- and STZ-treated mice on nephrin and WT1 staining. Immunofluorescence images were captured using a Zeiss LSM 510 confocal microscope equipped with a 40x objective and laser excitation at 488 or 543 nm. Sham: sham-operated; IR: ischemia/reperfusion; STZ: streptozotocin; STZ/IR: streptozotocin/ischemia/reperfusion. Bars = 100  $\mu$ m.

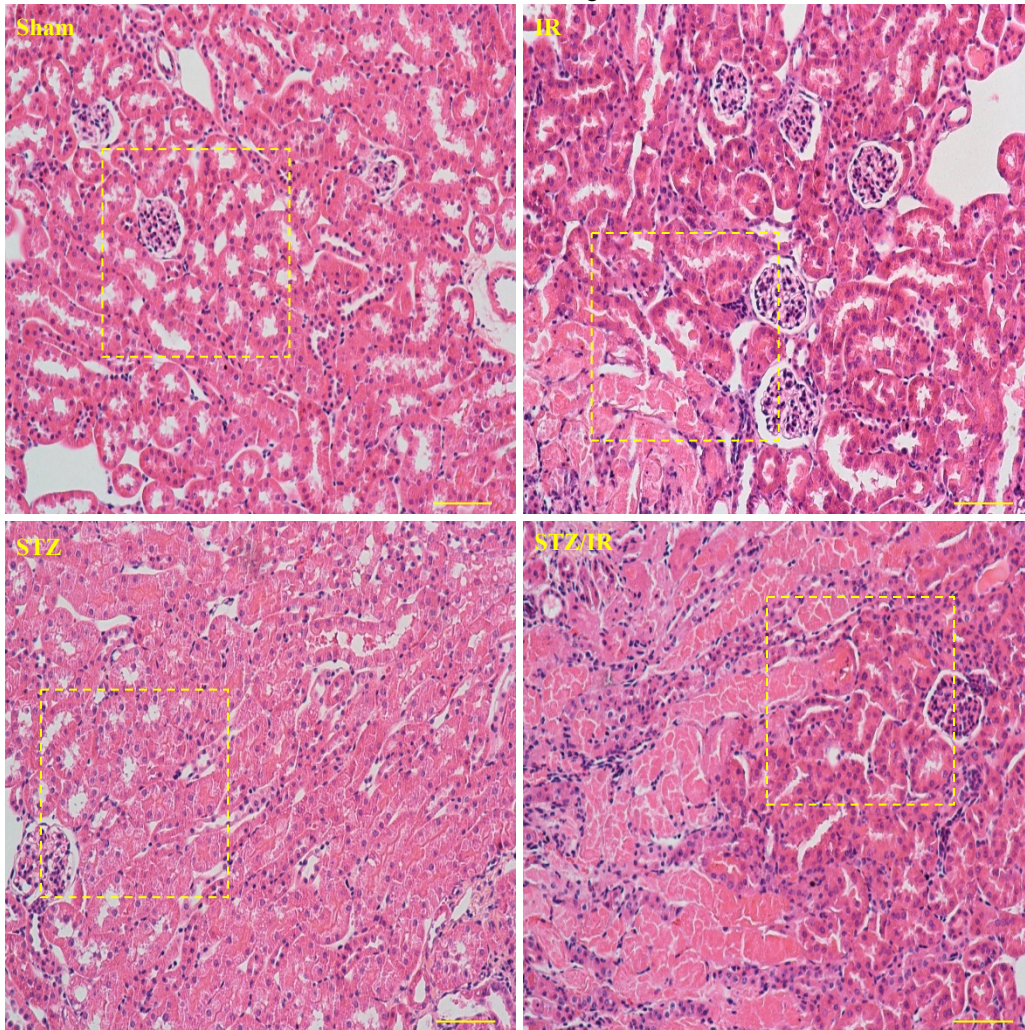

**Supplementary Fig. S3a:** Effect of renal ischemia/reperfusion in vehicle- and STZ-treated mice on tubular injury staining. Images were captured and analyzed using NIS-Elements (Nikon) software coupled to a light microscope equipped with a 20x objective (Eclipse 80i, Nikon, Tokyo, Japan). Sham: sham-operated; IR: ischemia/reperfusion; STZ: streptozotocin; STZ/IR: streptozotocin/ischemia/reperfusion. Bars = 100  $\mu\text{m}$ .

Megalyn

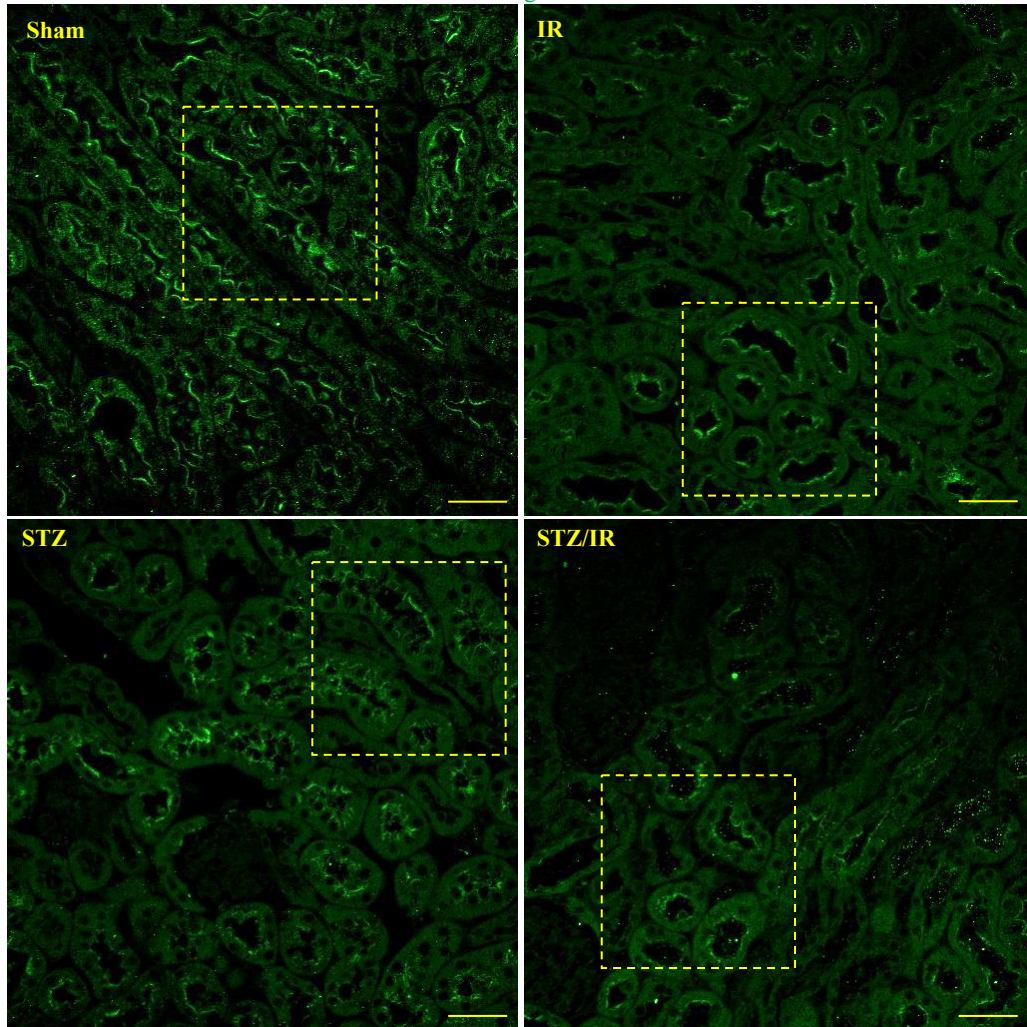

**Supplementary Fig. S3b:** Effect of renal ischemia/reperfusion in vehicle- and STZ-treated mice on megalin staining. Immunofluorescence images were captured using a Zeiss LSM 510 confocal microscope equipped with a 20x objective and laser excitation at 488 or 543 nm. Sham: sham-operated; IR: ischemia/reperfusion; STZ: streptozotocin; STZ/IR: streptozotocin/ischemia/reperfusion. Bars = 100  $\mu$ m.



M Sham IR STZ STZ/IR

pAMPK $\alpha$  →  
62 kDa

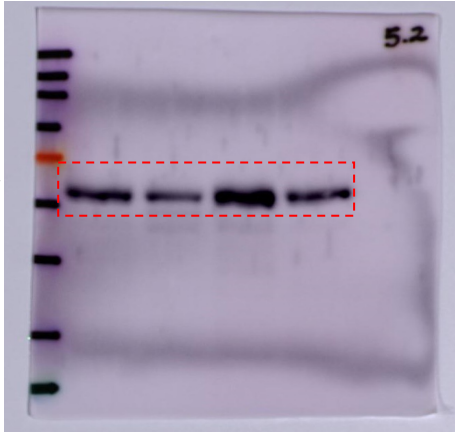

Sham IR STZ STZ/IR M

Beclin-1 →  
60 kDa

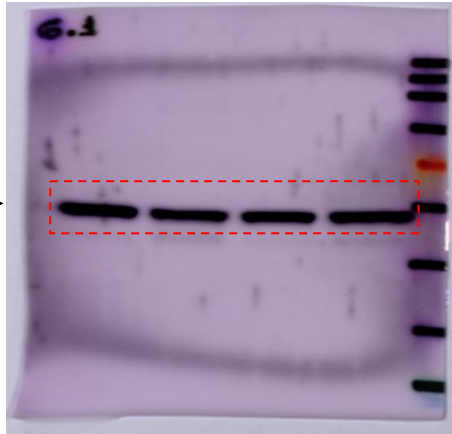

M Sham IR STZ STZ/IR

LC3 I  
16 kDa →  
LC3 II →  
14 kDa

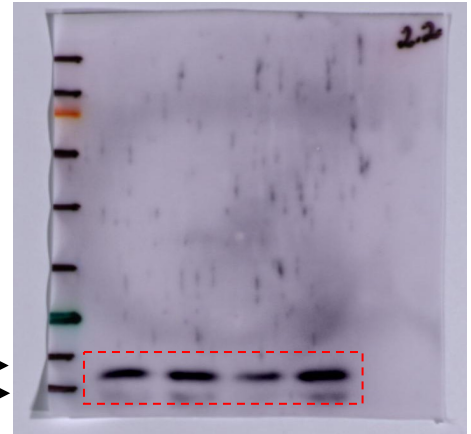

M Sham IR STZ STZ/IR

SQSTM1/p62 →  
62 kDa

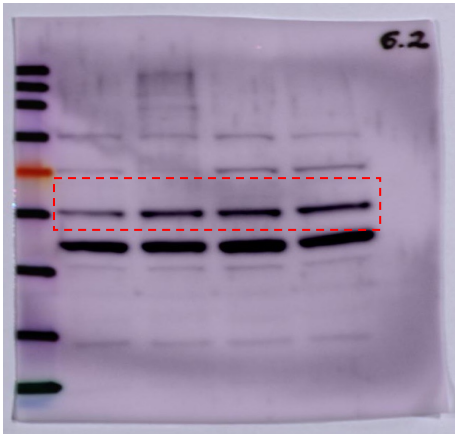

M Sham IR STZ STZ/IR

β-Actin →  
42 kDa

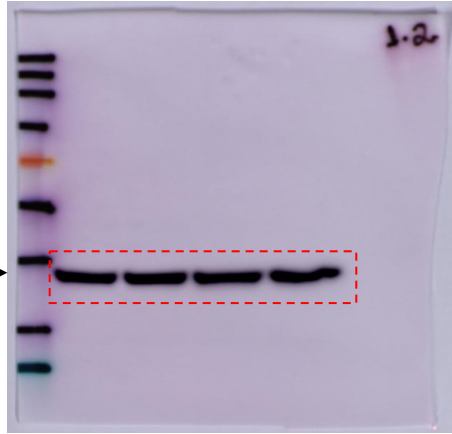

**Supplementary Fig. S4:** Effect of renal ischemia/reperfusion in vehicle- and STZ-treated mice on pAMPK $\alpha$ , Beclin -1, LC3 I and II, SQSTM1/p62 and  $\beta$ -actin protein expression. Representative full-length gel for each protein is presented. Sham: sham-operated; IR: ischemia reperfusion; STZ: streptozotocin; STZ/IR: streptozotocin/ischemia/reperfusion; M: marker.

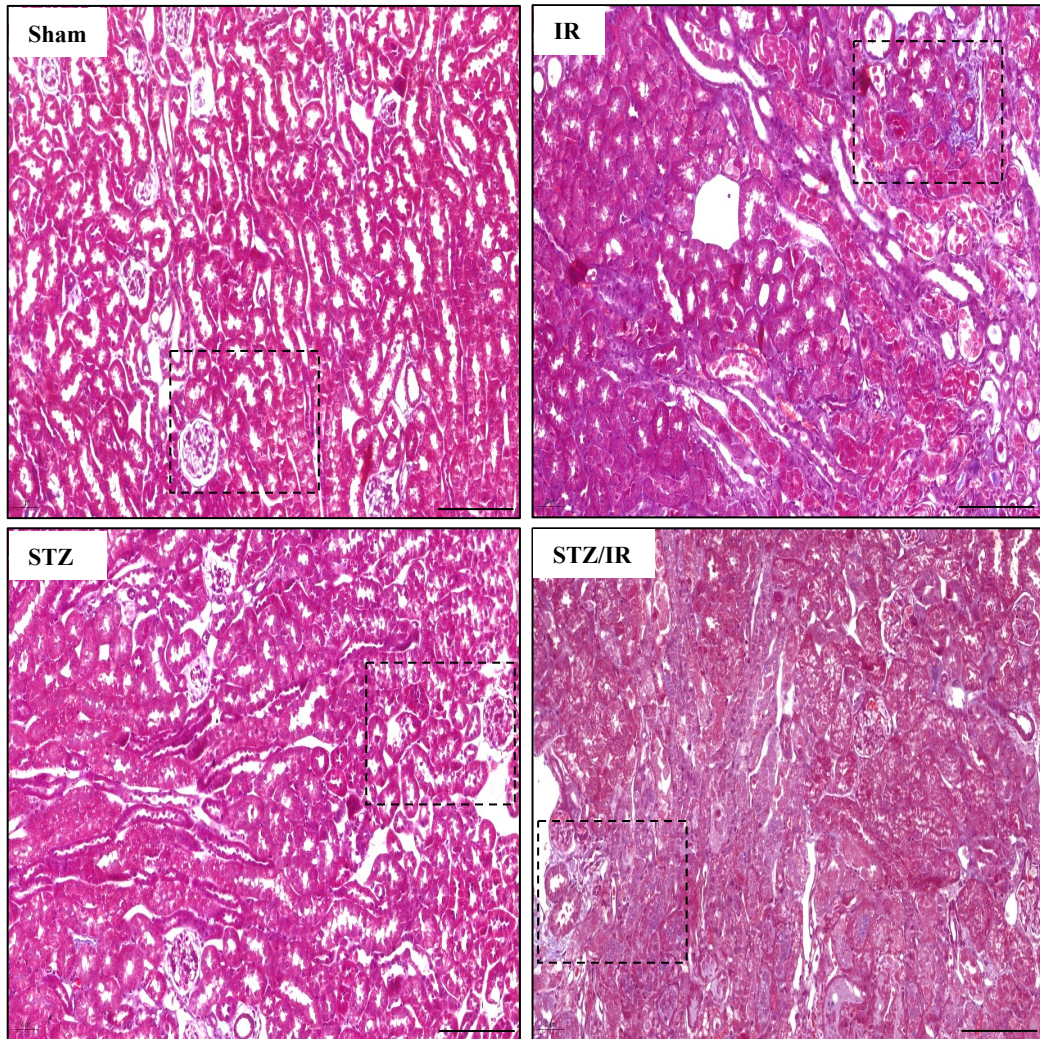

**Supplementary Fig. S5:** Effect of renal ischemia/reperfusion in vehicle- and STZ-treated mice on interstitial collagen volume. Images were captured and analyzed using NIS-Elements (Nikon) software coupled to a light microscope equipped with a 20x objective (Eclipse 80i, Sham: sham-operated; IR: ischemia reperfusion; STZ: streptozotocin; STZ/IR: streptozotocin/ischemia/reperfusion. Bars = 100  $\mu\text{m}$ .
